# Supplementary material for: Test-retest reliability of myelin imaging in the human spinal cord: Measurement errors versus region- and aging-induced variations
Source: PubMed Central journal article supplement (PMC5749716; doi:10.1371/journal.pone.0189944), 2018-01-02
Supplement: pone.0189944.s001.pdf [file pone.0189944.s001.pdf]

1                   **Test-retest reliability of myelin imaging**  
2           **in the human spinal cord: measurement errors versus**  
3                   **region- and aging-induced variations**

4  
5       Simon Lévy<sup>1,3,#a</sup>, Marie-Claude Guertin<sup>2</sup>, Ali Khatibi<sup>3,4,5,6,#b</sup>, Aviv Mezer<sup>7</sup>, Kristina  
6       Martinu<sup>3</sup>, Jen-I Chen<sup>3,8</sup>, Nikola Stikov<sup>1,9</sup>, Pierre Rainville<sup>3,8</sup>, Julien Cohen-Adad<sup>1,10\*</sup>

7  
8       <sup>1</sup>NeuroPoly Lab, Institute of Biomedical Engineering, Polytechnique Montreal, Montreal,  
9       QC, Canada

10       <sup>2</sup>Montreal Health Innovations Coordinating Center (MHICC), Montreal Heart Institute,  
11       Montreal, QC, Canada.

12       <sup>3</sup>Centre de Recherche de l'Institut Universitaire de Gériatrie de Montréal (CRIUGM),  
13       Montréal, QC, Canada

14       <sup>4</sup>Psychology Department, Bilkent University, Ankara-06800, Turkey

15       <sup>5</sup>Interdisciplinary program in Neuroscience, Bilkent University, Ankara-06800, Turkey

16       <sup>6</sup>National Magnetic Resonance Research Center (UMRAM), Bilkent University, Ankara-  
17       06800, Turkey

18       <sup>7</sup>The Edmond and Lily Safra Center for Brain Sciences (ELSC), The Hebrew University  
19       of Jerusalem, Jerusalem, Israel

20       <sup>8</sup>Department of Stomatology, Faculty of Dentistry, Université de Montréal, Montreal,  
21       QC, Canada

22       <sup>9</sup>Montreal Heart Institute, Montreal, QC, Canada

23       <sup>10</sup>Functional Neuroimaging Unit, CRIUGM, Université de Montréal, Montreal, QC,  
24       Canada

25  
26       #<sup>a</sup>Current Address: Centre d'Exploration Métabolique par Résonance Magnétique  
27       (CEMEREM), AP-HM, Hôpital de la Timone, Pôle d'imagerie médicale, Marseille,  
28       France

29  
30       #<sup>b</sup>Current Address: Psychology Department, Bilkent University, Ankara-06800, Turkey

31

- 32 \*Corresponding author
- 33 Email: [jcohen@polymtl.ca](mailto:jcohen@polymtl.ca)

## 34 **Supplementary material**

35        This section describes the data processing steps performed to estimate MTR,  $MT_{\text{sat}}$ ,  
36  $T_1$  and MTV maps (see introduction section in the main manuscript for definitions) and to  
37 register those maps to the MNI-Poly-AMU template [\[1\]](#) and WM atlas [\[2\]](#).

## 38 **1. Metric calculation**

39 Analysis was performed using the *Spinal Cord Toolbox* (SCT) version 2.2.3 [3]. The  
40 four FLASH images were first corrected for motion as follows: the image with flip angle  
41 20° was used as target for the three other images which were first registered using  
42 translations constrained in the z direction (2 degrees of freedom) and then slice-by-slice  
43 regularized translations [4]. Each metric was then computed as follows.

### 44 **1.1. MTR**

45 The MTR (%) map was computed voxel-wise using the 3D FLASH images with 10°  
46 flip angle with ( $MT_{on}$ ) and without ( $MT_{off}$ ) off-resonance saturation pulse according to  
47 the formula:

$$MTR = \frac{MT_{off} - MT_{on}}{MT_{off}} \times 100$$

### 48 **1.2. $MT_{sat}$**

49 The  $MT_{sat}$  map was computed according to the method described in [Helms et al. \[5\]](#)  
50 using the 3D FLASH image with 10° flip angle and off-resonance saturation pulse for the  
51 MT-weighted image, and the 3D FLASH images (without off-resonance saturation) with  
52 4 and 20° flip angles as the PD- and  $T_1$ -weighted images respectively.

### 53 **1.3. $T_1$**

54 The  $T_1$  map was obtained using the Variable Flip Angle (VFA) method, analytically  
55 resolving the steady-state signal of the FLASH sequence according to the exact solution  
56 derived in [Ganter \[6\]](#). This method accounts for incomplete spoiling and was shown to  
57 reduce the usual  $T_1$  overestimation of the VFA method [7] when compared to the gold-  
58 standard inversion recovery method in the brain WM [8]. Briefly, it models the steady-  
59 state signal as:

$$S(\alpha) = K \cdot \left| -i \frac{1 - E_1}{D} \sin(\alpha) \cdot (1 - \Lambda^*) \right| \text{ with } E_1 = \exp\left(-\frac{TR}{T_1}\right)$$

60  $D$  is a function of the flip angle  $\alpha$ ,  $E_1$  and  $\Lambda$ , while  $\Lambda$  is defined by a continued fraction  
 61 expansion [6].

62 The flip angle  $\alpha$  was corrected for transmit field inhomogeneities by computing a  $B_1^+$   
 63 map. This map was obtained using the double angle method [9-11] based on the 2D  
 64 segmented spin-echo EPI with flip angles of  $60^\circ$  and  $120^\circ$ ; a strong smoothing (kernel of  
 65  $25 \times 25$  voxels) was finally applied in plane in order to account for the low frequency  
 66 profile of the transmit field.

67  $\Lambda$  depends on  $T_2$ . Therefore prior knowledge of the  $T_2$  value is necessary to solve the  
 68 equation. As the  $T_2$  values of WM and GM are relatively close, a value of 73 ms was used  
 69 for the whole cord. For CSF, a  $T_2$  value of 2500 ms was used [12].

#### 70 **1.4. PD and MTV**

71 In the previous equation,  $K$  is a proportionality factor that includes the proton density,  
 72 the coil gain and the  $T_2^*$  relaxation time; it can be modeled as  $K = M0 \cdot \exp\left(-\frac{TE}{T_2^*}\right)$  where  
 73  $M0 = g \cdot PD$  with  $g$  the coil gain and  $PD$  the water proton density. Thus, once  $T_1$  and  $K$   
 74 are determined, we can obtain  $M0$  using  $T_2^*$  values of 50 and 120 ms for the cord and CSF  
 75 respectively [13,14] ( $T_2^*$  relaxation has a very small impact on the determination of  $M0$   
 76 given the very short TE). Then, we use the  $M0$  estimate to derive  $g$  and  $PD$ . To do so, the  
 77 method of analytical estimation of  $g$  [15] was adapted to the spinal cord. This method  
 78 consists of 5 general steps:

- 79 1- Splitting the cord into 2 clusters (WM and GM) using a  $k$ -means clustering  
 80 algorithm based on  $T_1$  values,
- 81 2- Parceling the region of interest (ROI) into 3D boxes of  $10 \times 10 \times 50$  mm with a 50%  
 82 overlap between adjacent boxes,

83 3- Discarding the boxes that do not include enough voxels (according to the  
84 clustering made at step #1),

85 4- In each box, repeating the following steps six times:

86 a. Estimating  $PD$  based on the  $T_1$  map and the empirical relation  $\frac{1}{PD} = A + \frac{B}{T_1}$   
87 [15-17] with initial values for the constants  $A$  and  $B$  taken from the  
88 literature (0.916 and 436 respectively),

89 b. Estimating  $g$  as  $g = M0/PD$ ,

90 c. Smoothing the estimated  $g$  by fitting a 3D 3<sup>rd</sup> order polynomial basis,

91 d. Calculating the new value of the constants  $A$  and  $B$  with the new  $g$  and the  
92 new  $PD = \frac{M0}{g}$ .

93 5- Calculating a global gain from the local gains ( $g_i$ ) estimated in each box:

94 a. Calculating a scale factor ( $f_{i,j}$ ) between adjacent boxes  $i$  and  $j$  in the  
95 overlapping regions by resolving the multilinear system of minimization  
96 equations:

$$\min_{f_{i,j}} \{|g_i - g_j \cdot f_{i,j}|\} \text{ for every } i, j \in [1, 2, \dots, n] \text{ and } i \neq j$$

97 b. Joining all the  $g_i$  using the scale factors calculated previously to get a  
98 global gain ( $g$ ) in the cord,

99 c. Fitting a 3D 3<sup>rd</sup> order polynomial basis to  $g$  in order to get an estimation of  
100 the global gain in the whole image.

101 Finally, the  $PD$  needs to be calibrated by its value in CSF, assuming that CSF is only

102 made of liquid protons. To do so, the peak of the voxel values distribution in the CSF was

103 used to normalize the  $PD$  map:  $PD := \frac{PD}{PD_{CSF}}$ . The  $MTV$  is defined as the complement of

104 the free proton density, i.e.  $MTV = 1 - PD$ .

## 105 **2. Template registration and metric estimation**

106 For metric estimation within ROIs, the MNI-Poly-AMU template [1] and WM atlas  
107 [2] were registered to the FLASH images. To do so, the warping field  $WF_{\text{template} \rightarrow \text{anat}}$  from  
108 the template to the sagittal anatomic image, which shows a high contrast between cord  
109 and CSF, was first estimated by registering the template to the sagittal image. Then, the  
110 warping field  $WF_{\text{anat} \rightarrow \text{FLASH}}$  from the sagittal anatomic image to the FLASH images was  
111 estimated based on the template WM probabilistic map (registered to the sagittal image)  
112 and the GM segmentation made on the MT-weighted FLASH image ( $MT_{on}$ ), allowing us  
113 to take into account the subject's GM shape. Finally, the warping fields  $WF_{\text{template} \rightarrow \text{anat}}$  and  
114  $WF_{\text{anat} \rightarrow \text{FLASH}}$  were concatenated to get a global warping field  $WF_{\text{template} \rightarrow \text{FLASH}}$  from the  
115 template space to the FLASH images space. Applying this global warping field to the  
116 WM atlas enables to get a fairly good estimation (robust to noise and partial volume  
117 effects) of each metric value in the different WM pathways using a *Maximum A*  
118 *Posteriori* approach, as proposed in Lévy et al. [2].

119 To study the metrics variations across WM regions, metrics were estimated within  
120 three sub-regions of the WM (right and left gathered) based on the spinal cord WM atlas  
121 proposed by Lévy et al. [2]:

- 122 - The dorsal column (DC): fasciculus gracilis, fasciculus cuneatus;
- 123 - The lateral funiculi (LF): lateral corticospinal tract, spinocerebellar tract,  
124 rubrospinal tract, lateral reticulospinal tract, spinal lemniscus;
- 125 - The ventral funiculi (VF): spino-olivary tract, ventrolateral reticulospinal tract,  
126 lateral vestibulospinal tract, ventral reticulospinal, ventral corticospinal tract,  
127 tectospinal tract, medial reticulospinal tract, medial longitudinal fasciculus.

## 128 3. References

129

- 130 1. Fonov VS, Le Troter A, Taso M, De Leener B, Lévêque G, Benhamou M, et al. (2014)  
131 Framework for integrated MRI average of the spinal cord white and gray matter:  
132 The MNI–Poly–AMU template. *NeuroImage* 102, Part 2: 817-827.
- 133 2. Lévy S, Benhamou M, Naaman C, Rainville P, Callot V, Cohen-Adad J (2015) White  
134 matter atlas of the human spinal cord with estimation of partial volume effect.  
135 *NeuroImage* 119: 262-271.
- 136 3. De Leener B, Lévy S, Dupont SM, Fonov VS, Stikov N, Louis Collins D, et al. (2016)  
137 SCT: Spinal Cord Toolbox, an open-source software for processing spinal cord  
138 MRI data. *NeuroImage*.
- 139 4. Cohen-Adad J, Lévy S, Avants B. Slice-by-slice regularized registration for spinal cord  
140 MRI: SliceReg 2015; Toronto, Canada.
- 141 5. Helms G, Dathe H, Kallenberg K, Dechent P (2008) High-resolution maps of  
142 magnetization transfer with inherent correction for RF inhomogeneity and T1  
143 relaxation obtained from 3D FLASH MRI. *Magnetic Resonance in Medicine* 60:  
144 1396-1407.
- 145 6. Ganter C (2006) Steady state of gradient echo sequences with radiofrequency phase  
146 cycling: Analytical solution, contrast enhancement with partial spoiling. *Magnetic*  
147 *Resonance in Medicine* 55: 98-107.
- 148 7. Stikov N, Boudreau M, Levesque IR, Tardif CL, Barral JK, Pike GB (2015) On the  
149 accuracy of T1 mapping: Searching for common ground. *Magnetic Resonance in*  
150 *Medicine* 73: 514-522.
- 151 8. Heule R, Ganter C, Bieri O (2015) Variable flip angle T1 mapping in the human brain  
152 with reduced t2 sensitivity using fast radiofrequency-spoiled gradient echo  
153 imaging. *Magnetic Resonance in Medicine*: n/a-n/a.
- 154 9. Insko E, Bolinger L. B1 mapping; 1992. pp. 4302.
- 155 10. Stollberger R, Wach P (1996) Imaging of the active B1 field in vivo. *Magnetic*  
156 *Resonance in Medicine* 35: 246-251.
- 157 11. Boudreau M, Tardif CL, Stikov N, Sled JG, Wayne L (2017) B1 Mapping for Bias-  
158 correction in Quantitative T1 Imaging of the Brain at 3 Tesla Using Standard  
159 Pulse Sequences. *Journal of Magnetic Resonance Imaging*.
- 160 12. Smith SA, Edden RAE, Farrell JAD, Barker PB, Van Zijl PCM (2008) Measurement  
161 of T1 and T2 in the cervical spinal cord at 3 tesla. *Magnetic Resonance in*  
162 *Medicine* 60: 213-219.
- 163 13. Wansapura JP, Holland SK, Dunn RS, Ball WS (1999) NMR relaxation times in the  
164 human brain at 3.0 tesla. *Journal of Magnetic Resonance Imaging* 9: 531-538.



- 165 14. Péran P, Hagberg G, Luccichenti G, Cherubini A, Brainovich V, Celsis P, et al.  
166 (2007) Voxel-based analysis of R2\* maps in the healthy human brain. *Journal of*  
167 *Magnetic Resonance Imaging* 26: 1413-1420.
- 168 15. Mezer A, Yeatman JD, Stikov N, Kay KN, Cho N-J, Dougherty RF, et al. (2013)  
169 Quantifying the local tissue volume and composition in individual brains with  
170 magnetic resonance imaging. *Nat Med* 19: 1667-1672.
- 171 16. Gelman N, Ewing JR, Gorell JM, Spickler EM, Solomon EG (2001) Interregional  
172 variation of longitudinal relaxation rates in human brain at 3.0 T: Relation to  
173 estimated iron and water contents. *Magnetic Resonance in Medicine* 45: 71-79.
- 174 17. Panos P, Fatouros, Anthony Marmarou (1999) Use of magnetic resonance imaging for  
175 in vivo measurements of water content in human brain: method and normal  
176 values. *Journal of Neurosurgery* 90: 109-115.  
177  
178
